# Supplementary material for: AG1®, a Novel Synbiotic, Demonstrates Superior Mineral Bioaccessibility and Bioavailability Compared to a Tablet Multivitamin and Mineral Supplement Using an In Vitro Model of the Upper Gastrointestinal Tract
Source: MDPI journal article supplement (doi:10.3390/applbiosci2040041), 2023-12-01
Supplement: s1 [file s1]

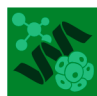**Table S1.** Ingredient list for tablet multivitamin and mineral supplement formulated for this study.

| Ingredient                                                                |
|---------------------------------------------------------------------------|
| Vitamin A (as beta-carotene)                                              |
| Vitamin C (as ascorbic acid)                                              |
| Vitamin E (as D-alpha-tocopherol)                                         |
| Thiamin (as thiamin hydrochloride)                                        |
| Riboflavin (vitamin B2)                                                   |
| Niacin (as nicotinic acid and niacinamide)                                |
| Vitamin B6 (pyridoxine hydrochloride)                                     |
| Folate (as L-5-methylfolate calcium)                                      |
| Vitamin B12 (as methylcobalamin)                                          |
| Biotin (as D-biotin)                                                      |
| Pantothenic acid (as calcium pantothenate)                                |
| Calcium (as tricalcium phosphate, calcium carbonate, and calcium citrate) |
| Phosphorous (as dipotassium phosphate)                                    |
| Magnesium (as magnesium glycinate chelate)                                |
| Zinc (as zinc citrate)                                                    |
| Selenium (as L-selenomethionine)                                          |
| Copper (as copper gluconate)                                              |
| Manganese (as manganese amino acid chelate)                               |
| Chromium (as chromium picolinate)                                         |
| Microcrystalline Cellulose*                                               |
| Silicon Dioxide*                                                          |
| Magnesium Stearate*                                                       |
| Stearic Acid*                                                             |

\*Excipients (necessary for formulation of tablet).
